# Supplementary material
Source: ML conference proceedings conference paper supplement (https://proceedings.neurips.cc/paper_files/paper/2013/hash/fb89705ae6d743bf1e848c206e16a1d7-Abstract.html)
Supplement: Supplementary file [file fb89705ae6d743bf1e848c206e16a1d7-Supplemental.zip]

---

# Active Learning for Probabilistic Hypotheses Using the Maximum Gibbs Error Criterion — Supplementary Material —

---

**Nguyen Viet Cuong    Wee Sun Lee    Nan Ye**  
 Department of Computer Science  
 National University of Singapore  
 {nvcuong, leews, yenan}@comp.nus.edu.sg

**Kian Ming A. Chai    Hai Leong Chieu**  
 DSO National Laboratories, Singapore  
 {ckianmin, chaileon}@dso.org.sg

## A Detailed Proof of Theorem 1

In the following, let  $\rho$  take range as the set of paths from the root to the leaves in the policy  $\pi$ . The notation  $p_0[\mathbf{y}; S]$  means the probability that examples in  $S$  are assigned labels  $\mathbf{y}$ , and we also use  $p_0[(\mathbf{y}, \mathbf{y}'); (S, S')]$  to refer to the probability that examples in  $S$  and  $S'$  are assigned labels  $\mathbf{y}$  and  $\mathbf{y}'$  respectively. Let  $\mathbf{1}(A)$  be the indicator function for the event  $A$ . In this proof, note that if we fix a labeling  $\mathbf{y}$  of  $X$ , the path  $\rho$  followed from the root to a leaf of the policy tree during the execution of the policy  $\pi$  is unique (we only consider deterministic policies). The entropy of the distribution  $p_0[\cdot; X]$  is

$$\begin{aligned}
 & - \sum_{\mathbf{y}} p_0[\mathbf{y}; X] \ln p_0[\mathbf{y}; X] \\
 = & - \sum_{\mathbf{y}} \left[ \sum_{\rho} \mathbf{1}(\mathbf{y} \text{ is consistent with } \rho) p_0[\mathbf{y}; X] \ln p_0[\mathbf{y}; X] \right] \\
 = & - \sum_{\rho} \left[ \sum_{\mathbf{y}} \mathbf{1}(\mathbf{y} \text{ is consistent with } \rho) p_0[\mathbf{y}; X] \ln p_0[\mathbf{y}; X] \right] \\
 = & - \sum_{\rho} \left[ \sum_{\mathbf{y}'} p_0[(y_{\rho}, \mathbf{y}'); (x_{\rho}, X \setminus x_{\rho})] \ln p_0[(y_{\rho}, \mathbf{y}'); (x_{\rho}, X \setminus x_{\rho})] \right] \\
 = & - \sum_{\rho} \left[ \sum_{\mathbf{y}'} p_0[(y_{\rho}, \mathbf{y}'); (x_{\rho}, X \setminus x_{\rho})] [\ln p_0[y_{\rho}; x_{\rho}] + \ln p_{\rho}[\mathbf{y}'; X \setminus x_{\rho}]] \right] \\
 = & - \sum_{\rho} \left[ \sum_{\mathbf{y}'} p_0[(y_{\rho}, \mathbf{y}'); (x_{\rho}, X \setminus x_{\rho})] \ln p_0[y_{\rho}; x_{\rho}] \right] \\
 & - \sum_{\rho} \left[ \sum_{\mathbf{y}'} p_0[(y_{\rho}, \mathbf{y}'); (x_{\rho}, X \setminus x_{\rho})] \ln p_{\rho}[\mathbf{y}'; X \setminus x_{\rho}] \right] \\
 = & - \sum_{\rho} p_0[y_{\rho}; x_{\rho}] \ln p_0[y_{\rho}; x_{\rho}] - \sum_{\rho} \left[ \sum_{\mathbf{y}'} p_0[y_{\rho}; x_{\rho}] p_{\rho}[\mathbf{y}'; X \setminus x_{\rho}] \ln p_{\rho}[\mathbf{y}'; X \setminus x_{\rho}] \right] \\
 = & H(\pi) + \sum_{\rho} p_0(y_{\rho}; x_{\rho}) G(\rho) \\
 = & H(\pi) + G(\pi).
 \end{aligned}$$

Thus, the theorem holds.

## B Proof of Theorem 4

To prove Theorem 4, we first reduce probabilistic hypotheses (or mappings) to deterministic (or noiseless) ones by expanding the hypothesis space. Then, we apply a known result on deterministic hypotheses to obtain the result for the probabilistic hypotheses.

### B.1 An Equivalence between Probabilistic and Deterministic Hypotheses

First, we establish a relationship between probabilistic and deterministic hypotheses. Recall that  $h \in \mathcal{H}$  is a probabilistic hypothesis, and  $\mathbb{P}[h(x) = y|h] \in [0, 1]$  for all  $h$  when  $h$  itself is probabilistic. Let  $T$  be a set of examples (without the labels) and let  $y_T$  be the labeling of  $T$ . Let  $\mathcal{D} = (T, y_T)$ . Let  $p_0$  be the prior on  $\mathcal{H}$ . The posterior  $p_{\mathcal{D}}$  is obtained from  $p_0$  using Bayes rule

$$p_{\mathcal{D}}[h] = p_0[h|\mathcal{D}] = \frac{p_0[h] \mathbb{P}[h(T) = y_T|h]}{p_0[h(T) = y_T]}.$$

From this noisy model for probabilistic hypothesis  $h$ , we construct an equivalent noiseless and deterministic one. We consider a hypothesis space  $\mathcal{H}'$  such that  $\mathcal{H}' = \{h'_{\mathbf{y}}\}_{\mathbf{y} \in \mathcal{Y}^{|X|}}$  and  $h'_{\mathbf{y}}(x) = \mathbf{y}_{\langle x \rangle}$  for all  $x \in X$ . In this definition, for any  $S \subseteq X$ ,  $\mathcal{Y}^{|S|}$  is the set of all labelings of  $S$  and  $\mathbf{y}_{\langle S \rangle}$  is the projection of  $\mathbf{y}$  on  $S$ , i.e. the labeling of  $S$  according to  $\mathbf{y}$ . Hence,  $\mathbf{y}_{\langle x \rangle}$  is the label of  $x$  according to  $\mathbf{y}$ .

In the above definition,  $\mathcal{H}'$  is indexed by the labelings of the pool  $X$  and each  $h'_{\mathbf{y}}$  in  $\mathcal{H}'$  is a deterministic hypothesis. Further, we construct a prior  $p'_0$  over  $\mathcal{H}'$  such that  $p'_0[h'_{\mathbf{y}}] = p_0[h(X) = \mathbf{y}] = \sum_{h \in \mathcal{H}} p_0[h] \mathbb{P}[h(X) = \mathbf{y}|h]$ . The result is that  $p'_0[h'_{\mathbf{y}}]$  is the probability that the labeling of  $X$  is  $\mathbf{y}$  in the probabilistic model. Given  $\mathcal{D}$ , the posterior  $p'_{\mathcal{D}}$  on  $\mathcal{H}'$  is obtained from  $p'_0$  by

$$p'_{\mathcal{D}}[h'_{\mathbf{y}}] = \frac{p'_0[h'_{\mathbf{y}}] \mathbf{1}(\mathbf{y}_{\langle T \rangle} = y_T)}{\sum_{\mathbf{y} \in \mathcal{Y}^{|X|}} p'_0[h'_{\mathbf{y}}] \mathbf{1}(\mathbf{y}_{\langle T \rangle} = y_T)},$$

where  $\mathbf{1}(A)$  is the indicator function for the event  $A$ . In essence, we have “moved” uncertainty associated with the likelihood  $\mathbb{P}[h(T) = y_T|h]$  into the prior  $p'_0$ .

We now prove that the above two models are in fact equivalent in the sense that  $p_{\mathcal{D}}[h(S) = y_S] = p'_{\mathcal{D}}[h'(S) = y_S]$  for any  $S \subseteq X \setminus T$  and  $y_S \in \mathcal{Y}^{|S|}$ . This means that both models always give the same probability for the event  $h(S) = y_S$ . To prove this result, we need the following lemma about  $p_0[\mathcal{D}] = p_0[h(T) = y_T]$ .

**Lemma 1.** *We have  $p_0[h(T) = y_T] = \sum_{\mathbf{y} \in \mathcal{Y}^{|X|}} p'_0[h'_{\mathbf{y}}] \mathbf{1}(\mathbf{y}_{\langle T \rangle} = y_T)$ .*

*Proof.* For a probabilistic hypothesis  $h$ ,  $p_0[h(T) = y_T] = \sum_{h \in \mathcal{H}} p_0[h] \mathbb{P}[h(T) = y_T|h]$ . Expanding  $\mathbb{P}[h(T) = y_T|h]$  by summing over all possible labelings of the remaining unlabeled examples in  $X \setminus T$ , we have

$$\begin{aligned} p_0[h(T) = y_T] &= \sum_{h \in \mathcal{H}} p_0[h] \sum_{\mathbf{y} \in \mathcal{Y}^{|X|}} \mathbb{P}[h(X) = \mathbf{y}|h] \mathbf{1}(\mathbf{y}_{\langle T \rangle} = y_T) \\ &= \sum_{\mathbf{y} \in \mathcal{Y}^{|X|}} \mathbf{1}(\mathbf{y}_{\langle T \rangle} = y_T) \sum_{h \in \mathcal{H}} p_0[h] \mathbb{P}[h(X) = \mathbf{y}|h] \\ &= \sum_{\mathbf{y} \in \mathcal{Y}^{|X|}} \mathbf{1}(\mathbf{y}_{\langle T \rangle} = y_T) p'_0[h'_{\mathbf{y}}]. \end{aligned}$$

□

Using Lemma 1, we can prove the following equivalence.

**Lemma 2.** *Let  $p_{\mathcal{D}}$  and  $p'_{\mathcal{D}}$  be the posteriors of the probabilistic and deterministic models respectively after observing the labeled examples  $\mathcal{D} = (T, y_T)$ . For any  $S \subseteq X \setminus T$  and  $y_S \in \mathcal{Y}^{|S|}$ , we have  $p_{\mathcal{D}}[h(S) = y_S] = p'_{\mathcal{D}}[h'(S) = y_S]$ .*

*Proof.* For the probabilistic hypotheses, we have

$$p_{\mathcal{D}}[h(S) = y_S] = \sum_{h \in \mathcal{H}} p_{\mathcal{D}}[h] \mathbb{P}[h(S) = y_S | h] = \sum_{h \in \mathcal{H}} \frac{p_0[h] \mathbb{P}[h(T) = y_T | h]}{p_0[h(T) = y_T]} \mathbb{P}[h(S) = y_S | h].$$

Expanding  $\mathbb{P}[h(T) = y_T | h] \mathbb{P}[h(S) = y_S | h]$  by summing over all possible labelings of the remaining unlabeled examples in  $X \setminus (T \cup S)$ , we have

$$\begin{aligned} p_{\mathcal{D}}[h(S) = y_S] &= \sum_{h \in \mathcal{H}} \frac{p_0[h]}{p_0[h(T) = y_T]} \sum_{\mathbf{y} \in \mathcal{Y}^{|X|}} \mathbb{P}[h(X) = \mathbf{y} | h] \mathbf{1}(\mathbf{y}_{\langle T \rangle} = y_T) \mathbf{1}(\mathbf{y}_{\langle S \rangle} = y_S) \\ &= \sum_{\mathbf{y} \in \mathcal{Y}^{|X|}} \frac{\mathbf{1}(\mathbf{y}_{\langle T \rangle} = y_T) \mathbf{1}(\mathbf{y}_{\langle S \rangle} = y_S)}{p_0[h(T) = y_T]} \sum_{h \in \mathcal{H}} p_0[h] \mathbb{P}[h(X) = \mathbf{y} | h] \\ &= \sum_{\mathbf{y} \in \mathcal{Y}^{|X|}} \frac{\mathbf{1}(\mathbf{y}_{\langle T \rangle} = y_T) \mathbf{1}(\mathbf{y}_{\langle S \rangle} = y_S)}{p_0[h(T) = y_T]} p'_0[h'_{\mathbf{y}}]. \end{aligned}$$

The last equality is from the definition of  $p'_0[h'_{\mathbf{y}}]$ . From Lemma 1 and the definition of  $p'_{\mathcal{D}}[h'_{\mathbf{y}}]$ :

$$\frac{p'_0[h'_{\mathbf{y}}] \mathbf{1}(\mathbf{y}_{\langle T \rangle} = y_T)}{p_0[h(T) = y_T]} = \frac{p'_0[h'_{\mathbf{y}}] \mathbf{1}(\mathbf{y}_{\langle T \rangle} = y_T)}{\sum_{\mathbf{y} \in \mathcal{Y}^{|X|}} p'_0[h'_{\mathbf{y}}] \mathbf{1}(\mathbf{y}_{\langle T \rangle} = y_T)} = p'_{\mathcal{D}}[h'_{\mathbf{y}}].$$

Thus,  $p_{\mathcal{D}}[h(S) = y_S] = \sum_{\mathbf{y} \in \mathcal{Y}^{|X|}} p'_{\mathcal{D}}[h'_{\mathbf{y}}] \mathbf{1}(\mathbf{y}_{\langle S \rangle} = y_S) = p'_{\mathcal{D}}[h'(S) = y_S]$ .  $\square$

## B.2 Near-optimality of the Noiseless Model

We now focus on the space  $\mathcal{H}'$  of deterministic hypotheses. We will make use of the notations for the noiseless model in [1]. In this model, for a set of unlabeled examples  $S \subseteq X$  and a hypothesis  $h \in \mathcal{H}'$ , we can define the version space  $V(S, h)$  as the set of all hypotheses in  $\mathcal{H}'$  that are consistent with  $h$  on  $S$ . Formally,  $V(S, h) = \{h' \in \mathcal{H}' : h'(S) = h(S)\}$ . The probability of the version space  $V(S, h)$  with respect to the prior  $p'_0$  is

$$p'_0[V(S, h)] = \sum_{h' \in V(S, h)} p'_0[h'] = \mathbb{P}_{h' \sim p'_0}[h'(S) = h(S) | h].$$

Let  $f(S, h) = 1 - p'_0[V(S, h)]$  be the version space reduction function. It is known that in the noiseless model, the version space reduction function  $f(S, h)$  is adaptive monotone submodular [1]. Thus, the greedy adaptive policy selecting  $x^* = \arg \max_x \mathbb{E}_{h \sim p'_{\mathcal{D}}}[f(S \cup \{x\}, h) - f(S, h)]$ , where  $S$  is the previously selected set and  $p'_{\mathcal{D}}$  is the current posterior of the noiseless model, is near-optimal. This property is stated in Theorem A below and is a direct consequence of Theorem 5.2 in [1].

**Theorem A.** *For any  $k \geq 1$ , in the noiseless model, let  $\pi$  be the greedy adaptive policy that selects  $k$  examples by the criterion  $x^* = \arg \max_x \mathbb{E}_{h \sim p'_{\mathcal{D}}}[f(S \cup \{x\}, h) - f(S, h)]$ , where  $S$  is the previously selected set and  $p'_{\mathcal{D}}$  is the posterior after observing the labels of  $S$ . Let  $\pi^*$  be the adaptive policy that selects the optimal  $k$  examples in terms of the version space reduction objective. We have*

$$\mathbb{E}_{h'_{\mathbf{y}} \sim p'_0}[f(x_{\rho^{\pi, \mathbf{y}}}, h'_{\mathbf{y}})] > (1 - \frac{1}{e}) \mathbb{E}_{h'_{\mathbf{y}} \sim p'_0}[f(x_{\rho^{\pi^*, \mathbf{y}}}, h'_{\mathbf{y}})],$$

where  $\mathbb{E}_{h'_{\mathbf{y}} \sim p'_0}[\cdot]$  is with respect to the distribution  $p'_0[h'_{\mathbf{y}}]$  and  $x_{\rho^{\pi, \mathbf{y}}}$  is the set of unlabeled examples selected by  $\pi$  (along the path  $\rho^{\pi, \mathbf{y}}$ ) assuming the true labeling of  $X$  is  $\mathbf{y}$ .

Note that once we assume the true labeling of  $X$  to be a fixed  $\mathbf{y}$ , the policy  $\pi$  follows exactly one path from the root to a leaf in the policy tree of  $\pi$ . This path is denoted by  $\rho^{\pi, \mathbf{y}}$  in Theorem A. Using Theorem A and Lemma 2, we can now prove Theorem 4.

## B.3 Proof of Theorem 4

For any algorithm  $\pi$ , we have

$$\begin{aligned} \mathbb{E}_{h'_{\mathbf{y}} \sim p'_0}[f(x_{\rho^{\pi, \mathbf{y}}}, h'_{\mathbf{y}})] &= \sum_{\mathbf{y}} p'_0[h'_{\mathbf{y}}] (1 - p'_0[V(x_{\rho^{\pi, \mathbf{y}}}, h'_{\mathbf{y}})]) \\ &= \sum_{\mathbf{y}} p'_0[h'_{\mathbf{y}}] (1 - p'_0[h'(x_{\rho^{\pi, \mathbf{y}}}) = \mathbf{y}_{\langle x_{\rho^{\pi, \mathbf{y}}} \rangle}]) . \end{aligned}$$

By definition of  $p'_0[h'_y]$ , we have  $p'_0[h'_y] = p_0[h(X) = \mathbf{y}] = p_0[\mathbf{y}; X]$ . From Lemma 2,  $p'_0[h'(x_{\rho^\pi, \mathbf{y}}) = \mathbf{y}_{\langle x_{\rho^\pi, \mathbf{y}} \rangle}] = p_0[h(x_{\rho^\pi, \mathbf{y}}) = \mathbf{y}_{\langle x_{\rho^\pi, \mathbf{y}} \rangle}]$ . Thus,

$$\begin{aligned} \mathbb{E}_{h'_y \sim p'_0}[f(x_{\rho^\pi, \mathbf{y}}, h'_y)] &= \sum_{\mathbf{y}} p_0[\mathbf{y}; X] (1 - p_0[h(x_{\rho^\pi, \mathbf{y}}) = \mathbf{y}_{\langle x_{\rho^\pi, \mathbf{y}} \rangle}]) \\ &= \sum_{\rho} \sum_{\mathbf{y}: \rho^\pi, \mathbf{y} = \rho} p_0[\mathbf{y}; X] (1 - p_0[h(x_{\rho^\pi, \mathbf{y}}) = \mathbf{y}_{\langle x_{\rho^\pi, \mathbf{y}} \rangle}]) \\ &= \sum_{\rho} (1 - p_0[h(x_\rho) = y_\rho]) \sum_{\mathbf{y}: \rho^\pi, \mathbf{y} = \rho} p_0[\mathbf{y}; X] \\ &= \sum_{\rho} (1 - p_0^\pi[\rho]) p_0^\pi[\rho] \\ &= V(\pi). \end{aligned}$$

Hence, the inequality in Theorem A is equivalent to  $V(\pi) > (1 - 1/e)V(\pi^*)$ .

Thus, to prove Theorem 4, what remains is to prove that the example  $x^*$  selected by  $\pi^{\max\text{GEC}}$  using Equation (3) satisfies  $x^* = \arg \max_x \mathbb{E}_{h \sim p'_D}[f(S \cup \{x\}, h) - f(S, h)]$ .

In the deterministic (noiseless) case, for any  $x \in X$ , consider

$$\begin{aligned} \mathbb{E}_{h' \sim p'_D}[p'_0[V(S \cup \{x\}, h')]] &= \sum_{h' \in \mathcal{H}': p'_D[h'] > 0} p'_D[h'] p'_0[V(S \cup \{x\}, h')] \\ &= \sum_{y \in \mathcal{Y}} \sum_{h' \in \mathcal{H}': p'_D[h'] > 0 \wedge h'(x) = y} p'_D[h'] p'_0[V(S \cup \{x\}, h')]. \end{aligned}$$

For all  $h'$  satisfying  $p'_D[h'] > 0$ , we have  $p'_D[h'] = \frac{p'_0[h']}{\sum_{h': p'_D[h'] > 0} p'_0[h']}$ .

Thus, if  $h'$  also satisfies  $h'(x) = y$ , we have

$$\begin{aligned} p'_0[V(S \cup \{x\}, h')] &= \sum_{h': p'_D[h'] > 0 \wedge h'(x) = y} p'_0[h'] \\ &= \sum_{h': p'_D[h'] > 0 \wedge h'(x) = y} \left( p'_D[h'] \sum_{h': p'_D[h'] > 0} p'_0[h'] \right). \end{aligned}$$

Hence,

$$\begin{aligned} \mathbb{E}_{h' \sim p'_D}[p'_0[V(S \cup \{x\}, h')]] &= \sum_{y \in \mathcal{Y}} \sum_{h': p'_D[h'] > 0 \wedge h'(x) = y} \left( p'_D[h'] \sum_{h': p'_D[h'] > 0 \wedge h'(x) = y} \left( p'_D[h'] \sum_{h': p'_D[h'] > 0} p'_0[h'] \right) \right) \\ &= \left( \sum_{h': p'_D[h'] > 0} p'_0[h'] \right) \left( \sum_{y \in \mathcal{Y}} \sum_{h': p'_D[h'] > 0 \wedge h'(x) = y} \left( p'_D[h'] \sum_{h': p'_D[h'] > 0 \wedge h'(x) = y} p'_D[h'] \right) \right) \\ &= \left( \sum_{h': p'_D[h'] > 0} p'_0[h'] \right) \left( \sum_{y \in \mathcal{Y}} \left( \sum_{h': p'_D[h'] > 0 \wedge h'(x) = y} p'_D[h'] \right)^2 \right) \\ &= \left( \sum_{h': p'_D[h'] > 0} p'_0[h'] \right) \left( \sum_{y \in \mathcal{Y}} (p'_D[h'(x) = y])^2 \right). \end{aligned}$$

Thus,

$$\begin{aligned}
\arg \max_x \left\{ 1 - \sum_{y \in \mathcal{Y}} (p'_D[h'(x) = y])^2 \right\} &= \arg \min_x \sum_{y \in \mathcal{Y}} (p'_D[h'(x) = y])^2 \\
&= \arg \min_x \mathbb{E}_{h' \sim p'_D} [p'_0[V(S \cup \{x\}, h')]] \\
&= \arg \max_x \mathbb{E}_{h' \sim p'_D} [f(S \cup \{x\}, h')] \\
&= \arg \max_x \mathbb{E}_{h' \sim p'_D} [f(S \cup \{x\}, h') - f(S, h')].
\end{aligned}$$

Furthermore, by Lemma 2, the example  $x^*$  selected by Equation (3) satisfies

$$x^* = \arg \max_x \left\{ 1 - \sum_{y \in \mathcal{Y}} (p_D[h(x) = y])^2 \right\} = \arg \max_x \left\{ 1 - \sum_{y \in \mathcal{Y}} (p'_D[h'(x) = y])^2 \right\}.$$

Thus,  $x^* = \arg \max_x \mathbb{E}_{h' \sim p'_D} [f(S \cup \{x\}, h') - f(S, h')]$  and Theorem 4 holds.

## C Proof of Theorem 5

We use the same notations as in Section 3.1 in the main paper. In each iteration of Algorithm 1, the example  $x^*$  selected for the current batch by Equation (4) satisfies

$$x^* = \arg \max_x \epsilon_g^p(S \cup \{x\}) = \arg \max_x \{ \epsilon_g^p(S \cup \{x\}) - \epsilon_g^p(S) \},$$

where  $p$  is the current posterior in the probabilistic model. From Theorem 3, the batch  $S$  selected in each iteration of Algorithm 1 is near optimal, i.e, it satisfies  $\epsilon_g^p(S) > (1 - 1/e) \max_{S': |S'|=s} \epsilon_g^p(S')$ . To prove the near-optimality for the whole batch algorithm, we can employ the same noiseless model  $\mathcal{H}'$  as in Section B.1. From Lemma 2,  $\epsilon_g^p(S) = 1 - \sum_{y_S} p[y_S; S]^2 = 1 - \sum_{y_S} p'[y_S; S]^2$ , where  $p'$  is the corresponding posterior in the noiseless model and the summations are over all possible labelings  $y_S$  of  $S$ . The following proposition states that  $1 - \sum_{y_S} p'[y_S; S]^2$  is equal to the expected version space reduction in the noiseless model.

**Proposition 1.** *For any  $S \subseteq X$ , in the noiseless model,*

$$\mathbb{E}_{h' \sim p'} [1 - p'[V(S, h')]] = 1 - \sum_{y_S} p'[y_S; S]^2.$$

*Proof.* In the noiseless model, we have  $\mathbb{E}_{h'_y \sim p'} [1 - p'[V(S, h'_y)]] = \mathbb{E}_{y \sim p'} [1 - p'[V(S, h'_y)]]$ , where the second expectation is with respect to  $p'[y; X] = p'[h'_y]$ . Furthermore,

$$\mathbb{E}_{y \sim p'} [1 - p'[V(S, h'_y)]] = \mathbb{E}_{y \sim p'} [1 - p'[y_{\langle S \rangle}; S]] = \mathbb{E}_{y_S \sim p'} [1 - p'[y_S; S]],$$

where  $\mathbb{E}_{y_S \sim p'} [\cdot]$  is the expectation with respect to the distribution  $p'[\cdot; S]$ . Hence,

$$\mathbb{E}_{h'_y \sim p'} [1 - p'[V(S, h'_y)]] = \mathbb{E}_{y_S \sim p'} [1 - p'[y_S; S]] = 1 - \sum_{y_S} p'[y_S; S]^2.$$

□

Thus,  $\epsilon_g^p(S)$  is equivalent to the expected version space reduction in the noiseless model with deterministic hypotheses. So, in the noiseless model, Algorithm 1 is equivalent to the BatchGreedy algorithm proposed in [2]. According to the results in [2], the version space reduction after observing the labeling of each batch is monotone adaptive submodular. Furthermore, from Theorem 3, the average version space reduction after selecting each batch is near-optimal, i.e, each iteration of Algorithm 1 is an  $e/(e-1)$ -approximate greedy step [1].

For any  $k \geq 1$ , let  $\pi_b^{\max \text{GEC}}$  be the policy selecting  $k$  batches using the batch maxGEC policy and  $\pi_b^*$  be the batch policy selecting the optimal  $k$  batches with respect to the policy Gibbs error objective. From Theorem 5.2 in [1],

$$\mathbb{E}_{h'_y \sim p'_0} [1 - p'_0[V(x_{\rho^{\pi_b^{\max \text{GEC}}, y}}, h'_y)]] \geq (1 - e^{-(e-1)/e}) \mathbb{E}_{h'_y \sim p'_0} [1 - p'_0[V(x_{\rho^{\pi_b^*, y}}, h'_y)]],$$

where  $p'_0$  is the prior of the noiseless model and  $x_{\rho^{\pi_b, \mathbf{y}}}$  is the set of all examples selected by the batch algorithm  $\pi_b$  after  $k$  iterations ( $k$   $s$  examples in total), assuming the true labeling of the pool  $X$  is  $\mathbf{y}$ .

From Section B.3,  $\mathbb{E}_{h'_y \sim p'_0}[1 - p'_0[V(x_{\rho^{\pi_b, \mathbf{y}}}, h'_y)]] = V(\pi_b)$  for any policy  $\pi_b$ . Thus, we obtain Theorem 5.

## D Derivation for the Approximation of Gibbs Error in Bayesian CRFs

We have:

$$\begin{aligned}
\sum_{\vec{y}} (p_{\mathcal{D}}[\vec{y}; \vec{x}])^2 &\approx \sum_{\vec{y}} \left( \frac{1}{N} \sum_{j=1}^N P_{\lambda^j}[\vec{y}|\vec{x}] \right)^2 \\
&= \frac{1}{N^2} \sum_{\vec{y}} \left( \sum_{j=1}^N \frac{\exp\left(\sum_{i=1}^m \lambda_i^j F_i(\vec{y}, \vec{x})\right)}{Z_{\lambda^j}(\vec{x})} \right)^2 \\
&= \frac{1}{N^2} \sum_{j=1}^N \sum_{t=1}^N \frac{1}{Z_{\lambda^j}(\vec{x}) Z_{\lambda^t}(\vec{x})} \sum_{\vec{y}} \exp\left(\sum_{i=1}^m \lambda_i^j F_i(\vec{y}, \vec{x})\right) \exp\left(\sum_{i=1}^m \lambda_i^t F_i(\vec{y}, \vec{x})\right) \\
&= \frac{1}{N^2} \sum_{j=1}^N \sum_{t=1}^N \frac{1}{Z_{\lambda^j}(\vec{x}) Z_{\lambda^t}(\vec{x})} \sum_{\vec{y}} \exp\left(\sum_{i=1}^m (\lambda_i^j + \lambda_i^t) F_i(\vec{y}, \vec{x})\right) \\
&= \frac{1}{N^2} \sum_{j=1}^N \sum_{t=1}^N \frac{Z_{\lambda^j + \lambda^t}(\vec{x})}{Z_{\lambda^j}(\vec{x}) Z_{\lambda^t}(\vec{x})}.
\end{aligned}$$

$$\text{Thus, } \epsilon_g^{pD}(\vec{x}) = 1 - \sum_{\vec{y}} (p_{\mathcal{D}}[\vec{y}; \vec{x}])^2 \approx 1 - \frac{1}{N^2} \sum_{j=1}^N \sum_{t=1}^N \frac{Z_{\lambda^j + \lambda^t}(\vec{x})}{Z_{\lambda^j}(\vec{x}) Z_{\lambda^t}(\vec{x})}.$$

## E Experimental Results for Text Classification using Bayesian Transductive Naive Bayes with Batch Sizes $s = 20, 30$

Table 1: AUC of different learning algorithms with batch size  $s = 20$ .

| Task                                      | TPass | maxGEC       | LC           | NPass | LogPass | LogFisher    |
|-------------------------------------------|-------|--------------|--------------|-------|---------|--------------|
| alt.atheism/comp.graphics                 | 87.62 | 91.52        | 91.70        | 84.85 | 91.28   | <b>93.37</b> |
| talk.politics.guns/talk.politics.mideast  | 84.23 | 92.52        | <b>92.56</b> | 80.61 | 85.89   | 86.93        |
| comp.sys.mac.hardware/comp.windows.x      | 73.96 | <b>91.71</b> | 89.98        | 74.79 | 85.83   | 88.06        |
| rec.motorcycles/rec.sport.baseball        | 93.65 | <b>95.95</b> | 95.93        | 92.04 | 89.25   | 93.11        |
| sci.crypt/sci.electronics                 | 61.10 | 86.19        | 85.97        | 61.28 | 82.80   | <b>86.93</b> |
| sci.space/soc.religion.christian          | 92.44 | <b>95.77</b> | <b>95.77</b> | 89.67 | 91.04   | 93.48        |
| soc.religion.christian/talk.politics.guns | 91.11 | <b>94.56</b> | <b>94.56</b> | 85.41 | 90.09   | 93.12        |
| Average                                   | 83.44 | <b>92.60</b> | 92.35        | 81.23 | 88.02   | 90.71        |

Table 2: AUC of different learning algorithms with batch size  $s = 30$ .

| Task                                      | TPass | maxGEC       | LC           | NPass | LogPass | LogFisher    |
|-------------------------------------------|-------|--------------|--------------|-------|---------|--------------|
| alt.atheism/comp.graphics                 | 87.72 | 92.22        | 92.22        | 85.27 | 91.05   | <b>92.88</b> |
| talk.politics.guns/talk.politics.mideast  | 85.13 | <b>92.20</b> | 92.17        | 81.00 | 85.63   | 86.35        |
| comp.sys.mac.hardware/comp.windows.x      | 72.81 | <b>88.58</b> | 88.53        | 74.53 | 85.75   | 87.52        |
| rec.motorcycles/rec.sport.baseball        | 94.03 | 96.21        | <b>96.22</b> | 92.09 | 89.03   | 92.22        |
| sci.crypt/sci.electronics                 | 61.71 | 86.12        | 85.25        | 61.62 | 82.74   | <b>86.31</b> |
| sci.space/soc.religion.christian          | 91.09 | <b>95.86</b> | <b>95.86</b> | 88.76 | 90.88   | 92.82        |
| soc.religion.christian/talk.politics.guns | 91.00 | <b>95.54</b> | <b>95.54</b> | 85.19 | 89.65   | 91.89        |
| Average                                   | 83.36 | <b>92.39</b> | 92.26        | 81.21 | 87.82   | 90.00        |

## References

- [1] Daniel Golovin and Andreas Krause. Adaptive Submodularity: Theory and Applications in Active Learning and Stochastic Optimization. *Journal of Artificial Intelligence Research*, 42(1):427–486, 2011.
- [2] Yuxin Chen and Andreas Krause. Near-optimal Batch Mode Active Learning and Adaptive Submodular Optimization. In *International Conference on Machine Learning (ICML)*, pages 160–168, 2013.
